# Supplementary material
Source: HighWire-hosted journal article supplement (http://www.jneurosci.org/highwire/filestream/599840/field_highwire_adjunct_files/1/Supplemental_Legend.pdf)
Supplement: Supplemental_Legend.pdf [file Supplemental_Legend.pdf]

**Supplementary Figure 1:** Voxel-wise regression analysis over the single subjects' SPM contrasts (anticipate reward vs. anticipate neutral). Top: As in the ROI analysis, activations in the left nucleus accumbens (left) and in the left anterior midbrain (right) correlated significantly with radioligand displacement in PET. Bottom: Additionally, correlations with [ $^{11}\text{C}$ ]raclopride displacement were also observed in the left amygdala (left), in the bilateral hippocampus (middle), and in the left thalamus (right). Coordinates are given in MNI space (Montreal Neurological Institute);  $p < .005$ , uncorrected; extent threshold  $k=15$  voxels.
